# Supplementary material for: Comparison of the bleaching susceptibility of coral species by using minimal samples of live corals
Source: PeerJ journal article supplement (doi:10.7717/peerj.12840), 2022-01-26
Supplement: Fig_S2_without_legend.pdf [file Fig_S2_without_legend.pdf]

**Step 1:** Open an image file in Photoshop and mark the fixed area for grayscale estimation.

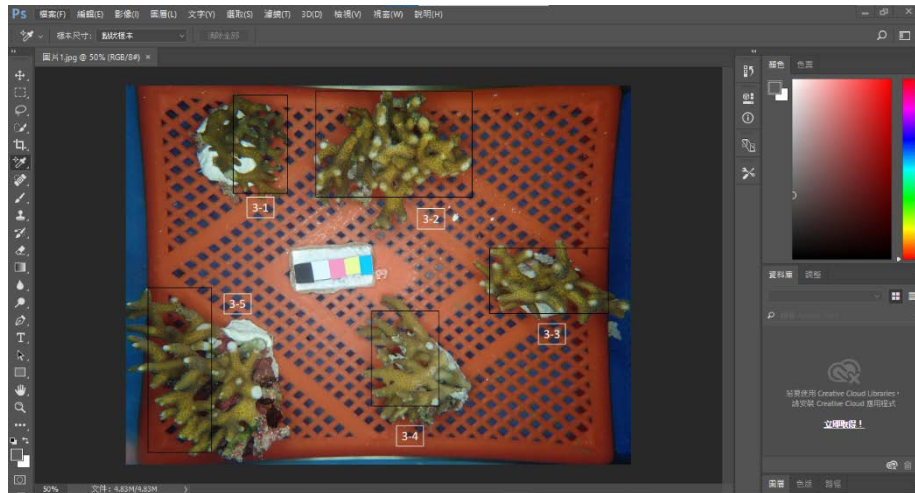

**Step 2:** Convert color image into grayscale image.

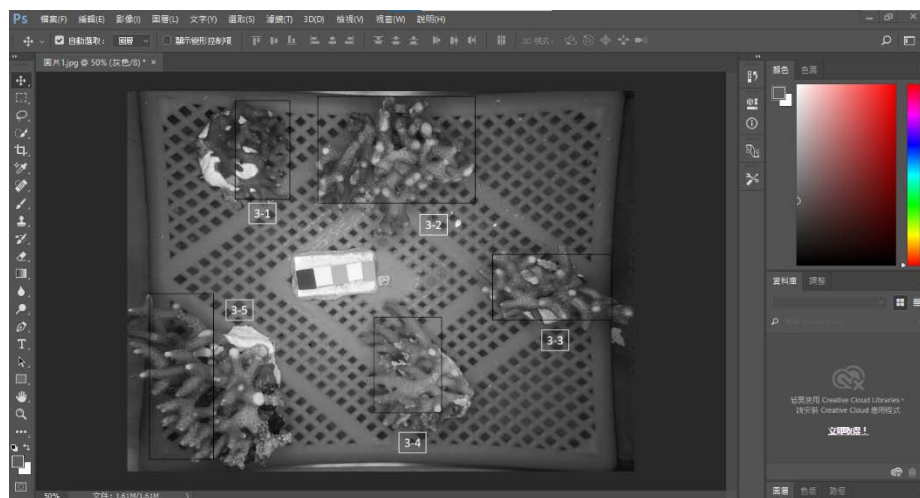

**Step 3:** Box the square with “rectangle select” and average the grayscale in the selected area.

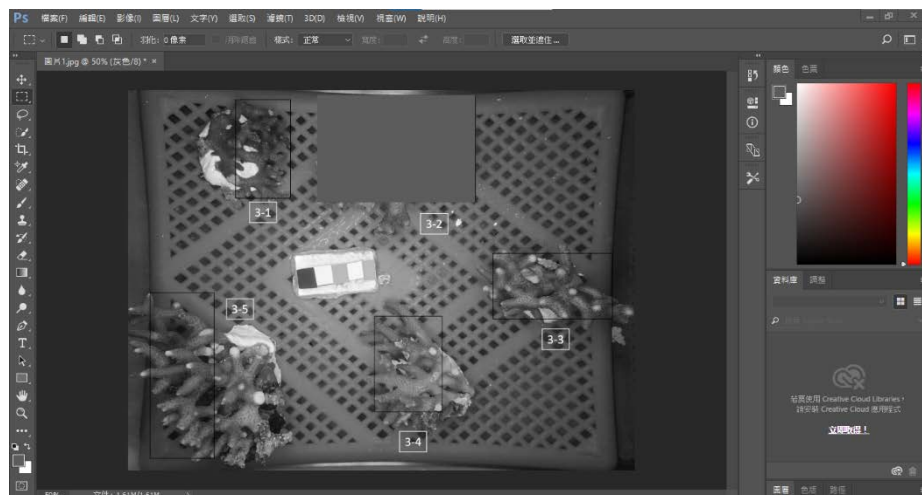

**Step 4:** Use “color selecting tool” to target the area for grayscale estimation (estimated grayscale is 77% in this case)

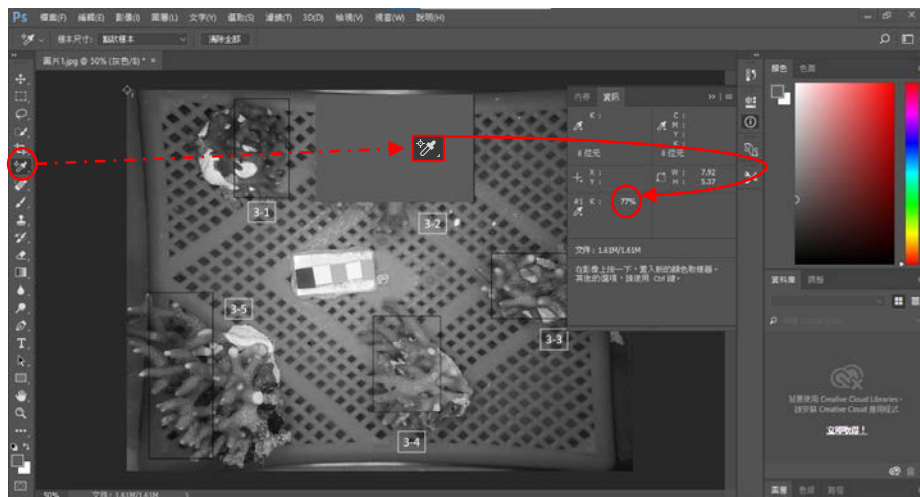

**Step 5:** Repeat the procedure from step 3 to 4 to estimate grayscale of standard black and white color strips (black: 80% and white: 7% in this case).

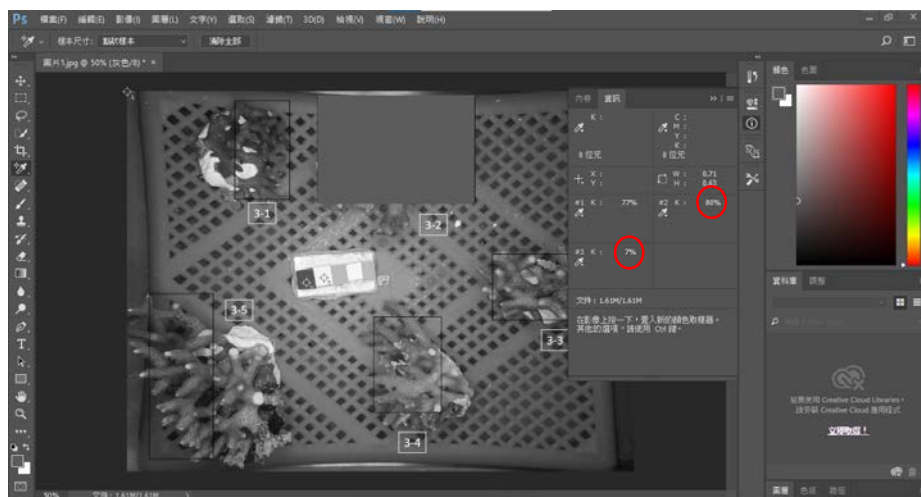

**Step 6:** Estimate  $G_0$  of a coral fragment at a time point.

$$G_c \text{ (grayscale of the coral fragment)} = 77\%$$

$$G_B \text{ (grayscale of standard black color strip)} = 80\%$$

$$G_w \text{ (grayscale of standard white color strip)} = 7\%$$

Then, above values are applied into the equation,  $G_0 = \left( \frac{G_c - G_w}{G_B - G_w} \right)$ , which

results in that  $G_0$  of the coral fragment is  $(77-7)/(80-7) * 100\% = 95.9\%$ .
