# Supplementary material for: Comparison of the bleaching susceptibility of coral species by using minimal samples of live corals
Source: PeerJ. 2022 Jan 26;10:e12840. doi: 10.7717/peerj.12840 (PMC8800388; doi:10.7717/peerj.12840)
Supplement: Supplemental Information 7 [file peerj-10-12840-s007.xlsx]

## Sheet: Seriatopora
1oC/Day							1oC/3Day
Days	No.3-1	No.3-2	No.3-3	No.3-4	No.3-5		time point	No.8-1	No.8-2	No.8-3	No.8-4	No.8-5
0.5	99.094	102.95	102.559	96.9671	102.821		0.5	88.7157	95.0286	97.7494	99.4965	96.7067
1	99.094	98.1789	98.2559	97.4772	97.6285		1	92.7846	95.4758	94.934	92.0818	93.5983
1.5	103.333	102.812	102.559	104.097	108.157		1.5	105.871	104.503	103.478	102.749	106.536
2	103.455	102.524	102.559	107.159	103.676		2	111.385	106.889	106.289	110.365	109.992
2.5	95.024	93.5346	94.0679	94.2996	87.718		2.5	101.244	98.1037	97.5487	95.3085	93.1669
3	94.969	93.273	93.9532	93.7535	87.7836		3	101.94	103.798	103.214	106.451	102.888
3.5	95.024	88.6942	85.5771	86.9515	92.5748		3.5	97.179	97.6796	97.3427	94.9939	96.3525
4	90.8441	88.3671	89.6504	75.1349	87.7836		4	92.9473	90.5172	91.08	91.0089	92.9426
4.5	94.969	88.3671	89.6504	52.7927	82.8612		4.5	101.411	97.6796	97.3427	91.0089	96.3525
5	86.8842	79.0133	77.0863	39.1887	78.0044		5	92.8917	91.0355	91.3684	87.4434	93.1669
5.5	66.0945	68.7437	68.1366	30.4504	58.249		5.5	101.411	97.6796	97.3427	94.9939	99.7623
6	48.9167	38.3005	45.8565	29.0221	32.9626		6	92.8917	94.5696	91.3684	87.4434	96.5319
6.5	47.5033	20.8597	35.2901	26.0449	26.4266		6.5	97.2933	100.874	97.1311	94.6708	96.1681
7	46.0079	18.192	42.5694	22.895	24.7908		7	80.2524	94.0984	91.08	87.0239	92.9426
7.5	12.532	4.5282	7.51244	3.10609	6.7472		7.5	-5.63837	100.874	97.1311	70.4377	96.1681
8	10.6172	2.40795	1.03828	-1.06628	3.67427		8	2.93927	93.6145	90.7838	42.1657	92.7122
8.5	-2.6543	1.9695	0.846004	0.764099	6.97373		8.5	-0.148679	97.6796	87.9487	15.2938	86.1228
9	-6.89381	-3.07263	0.846004	4.59125	1.91456		9	2.93927	97.2441	81.2628	9.85481	78.8883
9.5	1.58521	1.9695	0.846004	-3.06305	-3.1446		9.5	-1.34955	97.2441	71.7418	1.7771	58.1525
10	-2.6543	-3.27432	-3.57629	-1.22602	-9.41796		10	-4.38032	90.5172	28.453	3.33879	31.5645
							10.5		97.6796	9.66487	3.33879	14.5151
							11		93.6145	-1.25254	1.7771	9.76888
							11.5		86.3552	1.92113	5.81595	6.31291
							12		73.365	-1.33606	-3.00576	2.31126
							12.5		47.5424	-2.86053	-0.646217	0.875512
							13		26.0551	-2.86053	-4.63122	-2.53438
							13.5		4.56769	0.27082	3.33879	0.875512
							14		-4.38538	-1.25254	-2.26176	-0.599035
							14.5		-4.38538	1.92113	1.7771	2.85694
							15		-4.38538	1.92113	1.7771	-0.599035
							15.5		1.13364
							16		1.13364
							16.5		2.87387
							17		-0.755757

## Sheet: P verrucosa
1oC/Day							1oC/3Day
time point	No.2-1	No.2-2	No.2-3	No.2-4	No.2-5		time point	No.7-1	No.7-2	No.7-3	No.7-4	No.7-5
0.5	97.6899	103.735	102.282	100.912	101.09		0.5	95.4235	87.2496	91.9288	92.7887	90.6277
1	97.6899	99.9582	106.25	105.534	106.244		1	98.7287	101.87	103.964	99.4946	97.9074
1.5	86.9114	85.4555	86.5682	87.7247	96.6243		1.5	105.611	108.855	103.453	106.185	105.059
2	112.162	110.49	106.586	108.984	104.502		2	101.508	100.155	102.912	102.037	108.498
2.5	105.547	100.361	98.3139	96.845	91.5396		2.5	98.7287	101.87	97.7418	99.4946	97.9074
3	101.82	96.6346	94.3987	96.845	96.6243		3	105.457	108.529	103.186	109.67	108.784
3.5	101.82	100.361	98.3139	92.2849	96.6243		3.5	102.317	101.87	85.2971	99.4946	94.0112
4	97.6899	99.9582	106.25	96.2904	95.9371		4	95.1402	98.0647	79.0747	99.4946	97.9074
4.5	93.9124	96.1814	94.3458	87.0469	95.9371		4.5	95.1402	98.0647	79.0747	95.9554	94.0112
5	86.3573	92.4047	98.3139	91.6686	90.7838		5	88.341	91.0048	79.6478	96.2814	86.7827
5.5	89.0855	99.1189	98.3139	95.135	99.8021		5.5	87.9632	94.2594	85.2971	99.4946	94.0112
6	77.4381	87.4739	90.1572	90.3848	94.5057		6	87.9632	90.4541	79.0747	92.4161	94.0112
6.5	52.0357	78.2689	56.3649	79.2559	71.2011		6.5	84.3748	60.0113	85.2971	95.9554	94.0112
7	26.6285	65.3654	34.4785	63.5361	47.9887		7	77.1978	48.5953	79.0747	95.9554	90.115
7.5	16.9174	10.9826	11.9484	17.1764	12.8775		7.5	69.3905	1.18274	91.099	99.2076	93.5373
8	15.2608	5.03237	10.6593	-5.04388	5.17694		8	62.1165	-2.67403	84.7926	99.2076	89.5885
8.5	-6.11463	-3.82455	-2.24871	-2.66637	1.20052		8.5	62.1165	1.18274	91.099	99.2076	101.435
9	-2.28535	3.8324	5.7963	6.70382	1.20052		9	51.2056	5.03951	91.099	99.2076	97.4861
9.5	4.11502	2.41039	6.02616	1.08171	5.82743		9.5	44.9015	-0.874201	85.2971	95.9554	86.2188
10	-2.54063	-0.25131	0.43296	1.08171	0.0164315		10	36.6577	-2.67403	91.099	95.6206	85.6397
10.5	-2.54063	-3.97769	-7.39752	-3.47845	-5.06819		10.5	19.7822		85.2971	95.9554	82.3226
11	3.25159	-2.01379	-4.8579	-5.38879	-1.97619		11	14.8359		91.099	95.6206	89.5885
							11.5	12.6052		79.0747	92.4161	82.3226
							12	8.31771		74.1453	89.7043	87.332
							12.5	5.42828		79.0747	92.4161	86.2188
							13	1.83981		79.0747	92.4161	86.2188
							13.5	3.925		72.1797	95.6206	85.6397
							14	6.06733		52.31	91.6404	73.0359
							14.5	2.38054		39.5243	95.2766	53.0212
							15	3.925		15.4216	84.8594	6.66303
							15.5	0.793169		12.4436	76.4896	7.32117
							16	2.38054		1.1673	58.9146	0.983205
							16.5	-1.30625		1.1673	48.006	-11.0256
							17	3.925		-3.49775	41.8147	-1.23463
							17.5	3.925		-3.49775	31.0535	-1.23463
							18	-1.30625		1.1673	26.1888	-3.01972
							18.5	0.288035		-3.49775	16.7052	-1.23463
							19	0.288035		2.8087	13.1182	-1.23463
							19.5	-5.33714		-8.03839	7.47452	0.502854
							20	6.06733		7.56014	11.644	4.98613
							20.5				4.37163
							21				5.94404
							21.5				-1.23008
							22				0.73543
							22.5				0.73543
							23				0.73543
							23.5				-0.931162
							24				2.35698
							24.5				-0.931162
							25				-1.23008

## Sheet: P damincornis
1oC/Day							1oC/3Day
time point	No.1-1	No.1-2	No.1-3	No.1-4	No.1-5		time point	No.6-1	No.6-2	No.6-3	No.6-4	No.6-5
0.5	110.386	110.993	106.44	107.902	105.486		0.5	97.6183	103.744	97.8911	96.1602	86.7631
1	91.1865	93.6671	95.7465	92.855	91.603		1	101.485	107.714	97.6403	99.8774	101.104
1.5	103.874	99.8597	103.618	104.973	102.077		1.5	105.457	102.236	105.111	103.695	108.517
2	99.8054	100.498	100.947	101.087	105.322		2	105.457	104.793	108.649	107.728	116.76
2.5	94.7481	94.9826	93.2491	93.1829	95.5128		2.5	89.9836	81.5132	90.7078	92.5396	86.8556
3	94.1392	101.127	95.6763	95.6751	98.6056		3	101.32	100.643	104.789	99.7183	101.405
3.5	100.75	101.127	98.3115	98.832	102.278		3.5	97.4064	92.6811	101.247	99.8258	101.202
4	94.1392	101.127	93.0411	95.6751	102.278		4	97.4064	97.4584	97.3827	99.8258	101.202
4.5	97.1728	99.8597	98.2754	101.773	105.8		4.5	93.5424	84.1455	93.8274	96.0598	101.104
5	90.834	101.127	93.0411	92.5182	98.6056		5	97.4064	87.9037	105.111	99.8258	115.833
5.5	90.4718	99.8597	95.6041	88.9722	102.077		5.5	93.5424	79.4318	93.8274	96.0598	93.8861
6	83.7707	104.326	92.9328	72.9716	98.3541		6	93.5424	84.1455	93.8274	92.2421	93.8861
6.5	85.3731	108.597	98.1205	39.9036	93.3361		6.5	93.5424	84.1455	101.453	96.0598	93.8861
7	70.5165	102.552	83.7404	28.4522	65.0109		7	97.5137	79.4318	97.6403	96.0598	108.322
7.5	10.2687	107.047	15.6323	8.26909	19.2975		7.5	97.5137	79.4318	97.6403	96.0598	101.104
8	9.36944	88.1698	9.17991	11.2751	17.0493		8	89.3563	83.1263	101.247	92.0874	93.8861
8.5	1.77602	3.47249	0.736097	4.21338	7.50136		8.5	93.3813	78.3489	101.247	95.9566	101.202
9	1.77602	-1.05535	-1.9723	-2.27576	3.7266		9	89.571	74.7181	93.8274	88.4245	101.104
9.5	1.77602	3.47249	3.44449	0.968811	3.7266		9.5	85.5996	70.0045	90.0146	96.0598	93.8861
10	1.59239	-0.198736	0.809297	0.968811	-0.558256		10	81.3062	68.7942	89.6539	92.0874	71.9396
10.5	-0.126334	2.38581	-0.455596	2.5262	1.00878		10.5	81.3062	73.5716	89.6539	92.0874	71.9396
11	-5.0181	-4.60421	-1.8259	-2.18807	-7.90373		11	77.2811	68.7942	93.5183	92.0874	57.3085
							11.5	65.2059	64.0168	85.7895	92.0874	35.362
							12	57.7998	60.5771	78.576	84.6069	0.0523778
							12.5	53.1308	64.0168	81.9251	84.3489	-8.53117
							13	52.414	62.7079	85.366	84.0839	4.89732
							13.5	36.0932	53.0223	69.6967	52.7062	-2.51841
							14	33.0055	59.2394	62.6031	37.9183	6.09987
							14.5	18.0859	46.4361	51.8859	23.5248
							15	19.7724	48.1795	46.1927	17.4062
							15.5	7.53182	43.3367	38.3581	9.56174
							16	0.805012	35.3526	23.9592	3.09537
							16.5	0.805012	25.7978	8.50166	-0.773843
							17	4.83007	30.5752	4.63727	3.09537
							17.5	0.805012	21.0204	0.772878	-0.773843
							18	4.83007	21.0204	0.772878	-0.773843
							18.5	-0.628571	9.43695	3.1021	5.63952
							19	-3.22005	6.68832	0.772878	-0.773843
							19.5	-3.22005	1.91095	-3.09151	-0.773843
							20	-3.22005	1.91095	-3.09151	-4.64306
							20.5	0.805012	1.91095	0.772878	-0.773843
							21	0.805012	1.91095	0.772878	-0.773843
							21.5	0.805012	-2.86642	-3.09151	-0.773843
							22	0.805012	1.91095	0.772878	3.09537
							22.5	-3.22005	-2.86642	0.772878	-0.773843

## Sheet: Favites
1oC/Day							1oC/3Day
time point	5-1	5-2	5-3	5-4	5-5		time point	10-1	10-2	10-3	10-4	10-5
0.5	102.165	101.361	99.541	100.016	99.6975		0.5	99.402	96.9686	99.2007	98.7203	97.4862
1	97.6755	99.3853	98.1683	99.8075	97.6819		1	96.2729	100.317	99.0731	98.597	98.1977
1.5	102.388	101.546	102.035	101.955	103.219		1.5	100.322	100.6	99.3319	100.097	98.3007
2	98.7631	98.1701	100.256	98.9046	99.9233		2	104.752	103.862	105.84	105.814	107.066
2.5	99.0081	99.5385	99.9995	99.3168	99.4779		2.5	99.2511	98.2523	96.5543	96.7724	98.9498
3	97.3974	99.696	100.126	100.016	99.6975		3	102.24	100.172	101.601	101.038	101.587
3.5	94.7753	97.765	97.0296	95.7078	95.3086		3.5	98.7921	102.722	99.9788	99.4718	101.391
4	93.0351	97.225	98.1683	96.2934	94.5175		4	98.7921	100.6	101.273	100.097	99.0734
4.5	91.2263	95.5052	96.9472	95.0835	93.5911		4.5	99.9957	96.8756	96.5543	96.7724	98.1977
5	91.875	97.225	97.599	96.8791	93.7265		5	97.762	96.8756	96.5543	94.9478	97.4456
5.5	92.5413	96.8017	98.8454	96.9424	97.8743		5.5	101.852	100.6	99.9788	98.2221	96.7553
6	90.8421	96.3668	97.2012	97.6092	96.4465		6	98.6474	94.8757	97.9243	96.871	95.9617
6.5	93.4273	96.6012	82.948	97.1431	100.155		6.5	97.8928	94.8757	96.0097	96.871	95.9617
7	92.9108	99.0381	70.0257	89.0561	102.089		7	97.1382	95.5733	97.2861	97.4874	95.1995
7.5	90.5529	96.9787	17.2942	63.1251	100.893		7.5	97.2622	93.5282	97.391	96.3475	97.528
8	74.0953	91.5659	7.21936	37.4455	86.8818		8	98.9409	97.1624	101.434	98.3436	96.7875
8.5	59.7272	84.0502	6.56562	10.5287	62.551		8.5	94.9674	94.2354	98.6849	96.3475	96.7553
9	48.6131	71.729	2.39734	6.17218	16.6946		9	95.7323	94.9426	98.038	94.4729	98.3007
9.5	39.5498	32.3486	2.99042	4.34193	10.1022		9.5	94.1197	92.0851	95.3715	91.3232	96.724
10	1.51813	4.75063	1.1527	1.24856	8.23358		10	94.9674	90.6994	97.391	91.3485	96.7553
10.5	-0.932781	1.09182	-0.900203	-0.343492	-1.20373		10.5	93.3651	90.6898	95.3715	90.7068	97.4862
11	-1.51283	1.09182	1.37723	0.242186	-1.99482		11	93.3651	90.6898	93.4569	88.8575	94.4372
11.5	0.807365	2.17197	0.238515	-0.929171	0.378438		11.5	92.6105	89.9922	94.0951	87.0082	95.1995
12	0.830881	2.65366	1.32338	1.37397	0.859503		12	96.3836	87.2016	92.1804	88.2411	97.4862
12.5	0.227316	-2.14862	-0.900203	0.242186	1.16952		12.5	91.8559	87.2016	90.2658	83.9261	96.724
13	-0.352732	-3.76884	-2.03892	-0.929171	-0.412647		13	91.1012	84.411	90.904	87.6247	94.4372
							13.5	91.0218	80.4822	90.249	86.4729	92.9528
							14	93.5118	79.2368	91.5954	88.8404	93.6538
							14.5	91.1426	77.2626	88.9807	87.5993	91.3464
							15	100.492	74.9347	88.9717	89.4739	92.8704
							15.5	93.5118	75.6517	87.6598	91.3746	92.0869
							16	89.6127	70.1906	82.5111	88.2242	88.2557
							16.5	91.1426	60.997	76.6886	82.6004	87.483
							17	85.7879	56.0466	64.3965	79.4761	80.5287
							17.5	85.7879	54.6322	44.341	75.7269	80.5287
							18	86.5098	55.0903	23.7753	72.7698	81.7258
							18.5	86.5529	46.853	13.9343	73.2274	80.5287
							19	87.285	35.4165	4.61821	69.2729	76.7094
							19.5	84.258	30.5874	-1.59252	61.3549	68.1656
							20	78.1384	23.5154	-4.18033	51.9819	63.5294
							20.5	78.0002	24.0261	1.07615	52.7283	67.0172
							21	69.972	18.8326	-3.55086	43.8587	57.849
							21.5	66.664	15.029	-1.59252	41.9841	55.8024
							22	55.9547	14.3218	-0.29862	36.3603	34.9396
							22.5	49.835	15.029	-2.23947	28.237	34.9396
							23	42.3236	13.2708	0.420215	6.47952	2.77614
							23.5	37.6701	12.5538	0.420215	2.67825	0.42586
							24	30.6681	7.10036	3.15482	2.74071	0.69068
							24.5	29.1813	4.42097	-0.29862	-0.506836	-2.92249
							25	17.5051	2.51546	1.07615	0.144066	1.99272
							25.5	12.076	-4.65476	-0.235722	-0.489479	1.20929
							26	11.8664	-0.701453	1.55481	-1.14015	-0.844564
							26.5	0.877962	-1.23663	0.995282	-1.1317	-0.604402
							27	-0.333216	-3.22072	1.07615	-0.489479	0.42586
							27.5	2.40787	-2.65103	0.348331	0.11803	0.168294
							28	1.21794	-1.06965	1.73209	0.777612	-0.357568
							28.5	-1.4169	-0.529432	1.64223	0.742897	0.94099
							29	-0.651947	0.884968	-2.88643	-1.1317	-1.3771
							29.5	1.64292	0.884968	0.348331	1.36776	2.48638
							30	-0.792009	-0.170851	-0.836228	-1.75657	-1.69271

## Sheet: Millepora
1oC/Day							1oC/3Day
time point	No.4-1	No.4-2	No.4-3	No.4-4	No4-5		time point	No.9-1	No.9-2	No.9-3	No.9-4	No.9-5
0.5	101.459	104.835	101.401	77.4073	108.032		0.5	93.4409	88.6002	83.1966	95.159	89.5913
1	93.5652	94.1808	89.949	101.775	92.5368		1	89.3147	93.2252	90.911	99.6507	91.4528
1.5	103.307	100.023	103.885	107.419	100.158		1.5	106.78	103.803	99.3206	102.937	105.374
2	103.479	104.599	110.031	109.806	101.818		2	109.926	119.557	127.799	113.461	120.194
2.5	98.1895	96.3623	94.7345	103.594	97.4549		2.5	100.538	94.8152	98.7725	88.7928	93.388
3	95.4208	102.152	102.626	107.085	97.3055		3	110.339	97.526	106.755	104.471	109.676
3.5	99.7523	99.7655	101.344	103.879	98.2713		3.5	103.313	90.6672	93.2792	99.7249	118.316
4	98.6649	101.476	101.489	103.459	97.5508		4	99.0314	84.4915	106.134	105.41	119.933
4.5	103.662	98.8659	107.143	107.824	101.848		4.5	104.214	92.225	99.0381	104.272	119.933
5	99.0328	98.546	103.961	102.353	97.2847		5	96.4648	92.225	106.858	108.703	126.472
5.5	108.47	104.083	114.631	107.76	99.6142		5.5	104.522	93.7175	105.128	104.272	123.17
6	100.551	99.1332	111.118	104.609	96.9855		6	101.777	99.657	118.314	110.76	134.02
6.5	108.998	108.446	118.887	105.272	102.706		6.5	111.982	105.962	123.373	109.976	121.267
7	107.925	110.069	119.303	104.06	104.029		7	100.469	102.702	119.161	137.019	123.919
7.5	103.712	107.864	119.987	104.385	99.745		7.5	113.127	116.585	137.762	105.483	132.267
8	96.6898	100.475	114.298	99.664	98.2815		8	106.358	113.793	131.787	101.025	129.628
8.5	90.5425	94.4511	104.517	94.9031	90.4131		8.5	118.2	111.984	126.201	108.722	137.05
9	87.5971	95.8631	104.279	93.4546	89.4487		9	108.218	114.672	125.075	98.4818	136.656
9.5	87.6497	95.5176	97.3936	92.7526	90.2991		9.5	123.715	120.702	139.214	106.427	139.894
10	87.2117	88.763	91.8871	88.5275	85.7197		10	106.91	113.029	116.531	101.676	133.354
10.5	85.0291	84.9172	79.8337	82.4783	82.4715		10.5	113.351	112.878	133.848	104.15	130.459
11	83.448	76.4259	74.4475	77.1814	77.2404		11	107.692	117.608	128.922	103.075	132.68
11.5	79.2091	65.6296	62.8807	68.1325	69.7952		11.5	109.149	114.674	134.362	103.075	145.181
12	79.2596	66.6534	62.0787	66.4427	69.7952		12	119.971	126.642	145.304	112.793	155.526
12.5	74.3794	62.9186	57.6282	61.7008	66.4808		12.5	122.26	127.055	146.711	117.361	149.964
13	73.8037	61.8572	58.2766	60.5589	68.8624		13	108.005	114.919	143.49	101.313	146.681
13.5	65.7921	55.7983	51.2963	51.3878	61.1442		13.5	128.659	124.12	153.173	112.16	150.029
14	63.8322	53.5247	53.766	52.0853	62.91		14	110.475	116.432	145.244	99.3514	143.399
14.5	55.5228	50.2702	46.5682	48.0456	58.9263		14.5	127.333	130.234	163.034	110.099	156.247
15	49.7765	44.7598	70.2216	44.9794	56.4283		15	123.453	124.348	160.228	106.135	152.139
15.5	45.7287	43.1169	44.4143	43.9151	53.549		15.5	126.188	126.902	165.754	103.421	148.182
16	42.361	41.4289	46.1852	42.6678	52.3809		16	115.486	121.124	158.449	102.422	142.438
16.5	34.8794	35.4859	37.7154	37.4288	43.1388		16.5	123.586	129.989	164	106.984	150.029
17	35.5574	34.4482	37.6662	38.1406	44.9046		17	111.801	122.301	157.825	103.645	141.964
17.5	31.1128	27.4895	29.6409	30.6679	36.3711		17.5	129.985	131.655	166.72	110.322	153.377
18	26.8678	25.0781	29.5918	27.1375	33.901		18	126.057	120.941	152.385	102.614	141.964
18.5	19.7108	17.7832	16.8237	19.6504	25.4784		18.5	118.2	119.427	154.371	103.645	143.465
19	24.0301	21.6289	21.6157	21.2114	28.0716		19	105.221	116.095	151.883	95.2288	132.398
19.5	18.2523	15.3717	21.053	17.6811	20.5995		19.5	113.127	114.674	150.129	97.0904	135.746
20	16.7477	12.762	15.4974	13.8617	18.9446		20	110.341	118.055	139.845	92.6158	128.306
20.5	13.1808	9.31286	15.4974	13.1642	14.7702		20.5	105.765	110.073	149.395	91.3435	123.18
21	13.1808	6.7031	12.0318	11.0288	13.8812		21	90.7407	107.19	139.101	89.8461	123.456
21.5	11.6992	4.48994	8.56628	7.92116	10.6451		21.5	81.8827	102.446	138.8	89.1587	118.05
22	9.53962	-0.453902	8.84759	6.37453	8.11341		22	81.1623	94.8826	120.316	76.7315	116.799
22.5	8.05806	-2.86536	5.10072	5.81444	6.34761		22.5	77.9544	93.3366	117.556	77.8646	113.267
23	7.94069	-6.43608	3.97902	4.75222	6.32285		23	75.4836	85.5566	109.681	72.4408	108.55
23.5	5.75148	-2.87842	5.03837	4.03066	3.75645		23.5	76.5673	80.5002	107.012	68.6732	102.229
24	6.43883	-1.42452	5.37334	5.59848	4.70766		24	76.6285	80.8032	101.807	67.6634	100.832
24.5	6.62769	-1.49156	6.4762	5.08828	4.75425		24.5	73.8396	75.7681	97.8626	56.4557	92.3901
25	4.24963	-3.9303	5.08818	3.30911	0.526076		25	68.0003	69.804	73.5459	55.347	89.571
25.5	4.46807	-6.31449	0.639259	1.42058	0.690702		25.5	62.3233	62.4924	73.4217	51.8	83.2009
26	3.48702	-3.72929	-12.2463	1.88054	-0.425131		26	58.5762	59.5578	73.4217	45.1223	79.9186
26.5	3.68763	-3.90303	4.10482	1.42058	1.45662		26.5	54.4668	54.9571	65.493	39.6985	65.5044
27	3.73882	-11.06	-0.40578	0.708774	0.035694		27	49.3938	53.5357	65.493	39.5987	67.0049
27.5	-0.128781	-7.14721	0.515793	-1.11584	-3.65551		27.5	41.5373	44.3344	60.3387	35.1057	51.0902
28	2.25726	-5.84051	-1.49996	0.708774	1.80149		28	41.4097	48.1662	61.3132	34.3143	53.7461
28.5	1.1108	-2.18934	-1.30278	-0.567281	0.314091		28.5	35.0069	35.1331	39.8825	29.5821	49.6553
29	0.558573	-0.463574	-0.593371	-0.423387	-0.0755297		29	33.6263	37.3939	47.7555	28.8141	47.0223
29.5	0.318023	-0.502197	0.00588269	0.270573	0.593658		29.5	28.4818	28.063	34.2525	23.2127	35.8003
30	-1.33273	0.890654	2.01474	0.708774	-3.0895		30	24.4983	26.3735	31.4938	23.2127	30.8835
30.5	-0.654666	2.26445	-0.124474	0.0113206	2.25728		30.5	18.3303	18.3965	15.8639	12.6644	23.8936
							31	-2.45568	-3.09361	-2.6058	0.886125	-4.58779
							31.5	1.47254	3.02031	9.74338	4.44831	3.19608
							32	-4.74534	-6.02822	-5.38021	-7.33	-7.93579
							32.5	-12.6018	-12.2949	-17.6213	-10.6689	-14.5661
