# Supplementary material for: Comparison of the bleaching susceptibility of coral species by using minimal samples of live corals
Source: PeerJ. 2022 Jan 26;10:e12840. doi: 10.7717/peerj.12840 (PMC8800388; doi:10.7717/peerj.12840)
Supplement: Supplemental Information 8 [file peerj-10-12840-s008.xlsx]

## Sheet: 工作表1
	BTI10%		BTI30%		BTI50%
	1C/day	1c/3 day	1C/day	1c/3 day	1C/day	1c/3 day
	FHP	SHP	FHP	SHP	FHP	SHP
Sc1	4.25071	6.89848	5.5798	7.0638	6.3852	7.15401
Sc2	4.08764	11.2588	5.2272	12.0644	5.86227	12.5031
Sc3	3.83973	8.59229	5.3082	9.3827	6.15759	9.75829
Sc4	3.08818	6.97304	3.9982	7.4797	4.84476	7.83418
Sc5	3.73782	8.30935	4.9649	9.1711	5.76435	9.66818
Pv1	5.24299	5.7679	6.039	7.5713	6.57564	8.86981
Pv2	6.26265	5.93175	6.8163	6.4569	7.09659	6.79679
Pv3	5.7513	13.0703	6.3568	13.8791	6.73321	14.4253
Pv4	6.17943	13.9135	6.8273	15.6698	7.12566	16.7247
Pv5	6.02674	13.1819	6.6095	14.1191	6.94105	14.4666
Pd1	6.50315	8.64045	6.9592	11.3654	7.16698	12.8133
Pd2	7.98058	5.17383	8.1474	10.5733	8.24686	13.8842
Pd3	6.88259	11.2703	7.1508	13.5238	7.28917	14.7011
Pd4	5.26909	11.7635	5.9968	13.0712	6.45439	13.7783
Pd5	6.55642	9.79442	6.9392	10.5466	7.17256	11.0222
Fc1	7.00935	17.2282	8.3329	20.8869	8.95966	22.6757
Fc2	8.33116	11.3474	8.9647	15.4876	9.28707	17.9124
Fc3	6.47677	15.1466	6.9407	16.6381	7.18352	17.3596
Fc4	6.81594	14.4996	7.4322	18.6056	7.78985	20.4662
Fc5	7.95759	16.7862	8.3954	19.724	8.63737	21.123
Mi1	9.86908	22.2068	12.7884	24.8386	15.1606	26.9747
Mi2	9.23318	22.9621	12.3972	25.4744	14.7422	27.5007
Mi3	9.95943	25.2661	12.2636	26.9609	14.5954	28.4513
Mi4	9.3613	20.4616	11.9394	23.5786	14.3775	25.9867
Mi5	8.90259	24.9868	12.8098	26.7861	15.6011	28.3424
	correlation					correlation					correlation
	BTI10%		FHP	SHP		BTI30%		FHP	SHP		BTI50%		FHP	SHP
	FHP	Pearson correlation	1	.754**		FHP	Pearson correlation	1	.895**		FHP	Pearson correlation	1	.898**
		significance (two tails)		1.37188e-05			significance (two tails)		1.60848e-09			significance (two tails)		1.16686e-09
		n	25	25			n	25	25			n	25	25
	SHP	Pearson correlation	.754**	1		SHP	Pearson correlation	.895**	1		SHP	Pearson correlation	.898**	1
		significance (two tails)	1.37188e-05				significance (two tails)	1.60848e-09				significance (two tails)	1.16686e-09
		n	25	25			n	25	25			n	25	25
	**. Significant at P=0.01 (two tails)					**. Significant at P=0.01 (two tails)					**. Significant at P=0.01 (two tails)
